# Supplementary material
Source: PubMed Central journal article supplement (PMC7808240)
Supplement: NIHMS1624374-supplement-1.pdf [file NIHMS1624374-supplement-1.pdf]

**sTable 1: Current Infectious and Environmental Factors Implicated in the Etiology of Sarcoidosis**

| Factors                                                                                                                                                                                                                                                                                    | Proof                                                                                                                                                                                                                                                                                                                                                |
|--------------------------------------------------------------------------------------------------------------------------------------------------------------------------------------------------------------------------------------------------------------------------------------------|------------------------------------------------------------------------------------------------------------------------------------------------------------------------------------------------------------------------------------------------------------------------------------------------------------------------------------------------------|
| <b>1. Occupational Hazards</b>                                                                                                                                                                                                                                                             |                                                                                                                                                                                                                                                                                                                                                      |
| <i>Indoor air (molds, bacteria, microbial contaminant)</i>                                                                                                                                                                                                                                 | - Epidemiologic and Immunologic proof[1]                                                                                                                                                                                                                                                                                                             |
| <i>Healthcare Workers</i>                                                                                                                                                                                                                                                                  | - Epidemiological proof [2-4]                                                                                                                                                                                                                                                                                                                        |
| <i>Inorganic dust exposure from construction work</i>                                                                                                                                                                                                                                      | - Epidemiological proof[5, 6]                                                                                                                                                                                                                                                                                                                        |
| <i>Metal dust, metalworking fluid, aerosols from Metal Industries</i>                                                                                                                                                                                                                      | - Epidemiological proof [7, 8]                                                                                                                                                                                                                                                                                                                       |
| <i>Insecticides, Pesticides, Mold/ Mildew, Silicates exposure (Agricultural workers)</i>                                                                                                                                                                                                   | - Epidemiological proof[9, 10]                                                                                                                                                                                                                                                                                                                       |
| <i>Silicates from Mining</i>                                                                                                                                                                                                                                                               | - Epidemiological proof [11]                                                                                                                                                                                                                                                                                                                         |
| <i>Organic Dust, Wood Dust, Metal Dust, Wood Burning (Naval and Military Personnel)</i>                                                                                                                                                                                                    | - Epidemiological proof[12, 13]                                                                                                                                                                                                                                                                                                                      |
| <i>Heavy dust exposure, Nanoparticles, carbon (Fire fighters)/Rescue workers</i>                                                                                                                                                                                                           | - Epidemiological proof[14-16]                                                                                                                                                                                                                                                                                                                       |
| <b>2. Organic Particles</b>                                                                                                                                                                                                                                                                |                                                                                                                                                                                                                                                                                                                                                      |
| <i>Brominated diphenyl ethers polycyclic aromatic hydrocarbons (PAHs), polychlorinated biphenyls, polychlorinated dibenzodioxins, polychlorinated dibenzofurans, pesticides, phthalate esters, and other hydrocarbons. From the explosion and collapse of the World Trade Center (WTC)</i> | - Analyses of total settled dust and smoke that settled immediately after the explosion and fire and the concurrent collapse of the two World Trade Center (WTC) structures[15]                                                                                                                                                                      |
| <b>3. Inorganic Particles</b>                                                                                                                                                                                                                                                              |                                                                                                                                                                                                                                                                                                                                                      |
| <i>Nanoparticles</i>                                                                                                                                                                                                                                                                       | - Experimental Models of Sarcoidosis [16-18]<br>- Saroid-like granulomas developing after exposure to nanoparticles[6, 19-21]<br>- Immune Response [22]                                                                                                                                                                                              |
| <i>Construction Materials, Soot, paint (leaded and unleaded), Fibers (e.g., mineral wool, fiberglass, asbestos, wood, paper, and cotton) Metals, Radionuclides, and Ionic species.</i>                                                                                                     | - Data from World Trade Center [15]                                                                                                                                                                                                                                                                                                                  |
| <b>4. Infectious Agents</b>                                                                                                                                                                                                                                                                |                                                                                                                                                                                                                                                                                                                                                      |
| <b>Bacteria, Fungi and Parasites</b>                                                                                                                                                                                                                                                       |                                                                                                                                                                                                                                                                                                                                                      |
| • <i>Mycobacteria</i>                                                                                                                                                                                                                                                                      | - Nucleic acid[23-27]<br>- Cell Constituent [28]<br>- Immune Response and Circulating Antibodies [24, 27, 29-37]<br>- Success of Anti-mycobacterial therapy[35-37]<br>- Experimental Disease Models[38-47]<br>- Proteomics[48]<br>- Meta-analysis[29, 49]<br>- Similarities in Transcriptome Profile of Sarcoidosis to Tuberculosis infection[50-53] |
| • <i>Propionibacteria</i>                                                                                                                                                                                                                                                                  | - Success of Antibiotics[54-56]<br>- Experimental Disease Models[57-65]<br>- Meta-analysis [66]<br>- Bacterial Culture[67-69]<br>- Immune Response, Immunohistochemistry[60, 70-79]<br>- Microbial Components [80, 81]<br>- Nucleic Acid[65, 80-84]                                                                                                  |

|                                               |                                                                                                                                            |
|-----------------------------------------------|--------------------------------------------------------------------------------------------------------------------------------------------|
| • <i>Chlamydia pneumoniae</i>                 | - Immunological proof[85-87]                                                                                                               |
| • <i>Rickettsia helvetica</i> ,               | - Nucleic acid[86, 88, 89]                                                                                                                 |
| • <i>Leishmania species</i>                   | - Nucleic acid[88, 90]                                                                                                                     |
| • <i>Molds</i>                                | - Immune response and elevated N-acetylhexosaminidase (NAHA) in homes of Sarcoidosis patients[88, 91-94]                                   |
| • <i>Borrelia burgdorferi</i>                 | - Nucleic acid and Immunohistochemistry[95]                                                                                                |
| <b>Viruses</b>                                |                                                                                                                                            |
| • <i>Epstein-Barr virus (EBV)</i>             | - Antibodies, Association between Immunosuppression therapy and increased risk for the development of EBV in Sarcoidosis patients [96, 97] |
| • <i>Human herpesvirus 6 (HHV6)</i>           | - Antibodies[98]                                                                                                                           |
| • <i>Human herpesvirus 8 (HHV8)</i>           | - Antibodies[99]                                                                                                                           |
| • <i>Human T-lymphotropic virus 1 (HTLV1)</i> | - Antibodies[100]                                                                                                                          |
| • <i>Cytomegalovirus (CMV)</i>                | - Antibodies[101, 102]                                                                                                                     |

**sTable 2: 2017 JMHW revised criteria to diagnose isolated cardiac sarcoid (ICS)<sup>[103, 104]</sup>**

- 
1. No clinical findings characteristics of sarcoidosis observed in any organs other than the heart

---

  2. 67Ga scintigraphy or 18F-FDG PET without abnormal tracer accumulation in any organs other than the heart

---

  3. A chest CT scan reveals revealing no shadowing along the lymphatic tracts in the lungs or no hilar and mediastinal lymphadenopathy (minor axis >10 mm)

---

  4. Either a histological or a clinical diagnosis

---

**sTable 3: Potentially Dangerous Clinical Scenarios Related to Pulmonary Sarcoidosis**

| Condition                                            | Mechanism                                                                                                                                                                                                                                                                                                                                  | Treatment                                                                                                                                                                                                              | Percentage of pulmonary sarcoidosis patients                     |
|------------------------------------------------------|--------------------------------------------------------------------------------------------------------------------------------------------------------------------------------------------------------------------------------------------------------------------------------------------------------------------------------------------|------------------------------------------------------------------------------------------------------------------------------------------------------------------------------------------------------------------------|------------------------------------------------------------------|
| <i>Fibrocystic sarcoidosis</i>                       | The fibrosis is the result of granulomatous inflammation in a subset of sarcoidosis patients.                                                                                                                                                                                                                                              | <ul style="list-style-type: none"> <li>• No known specific treatment</li> <li>• Anti-granulomatous therapy may be beneficial in preventing further development of fibrosis</li> </ul>                                  | 10 – 20%                                                         |
| <i>Sarcoidosis-associated pulmonary hypertension</i> | Predominantly from fibrotic distortion of the pulmonary vasculature. Other mechanisms include pulmonary venous hypertension from cardiac sarcoidosis or from corticosteroid-induced diabetic/atherosclerotic cardiomyopathy, pulmonary hypoxemia from parenchymal sarcoidosis, granulomatous inflammation of pulmonary arteries and veins. | <ul style="list-style-type: none"> <li>• Pulmonary vasodilators, oxygen.</li> <li>• Anti-granulomatous therapy may be beneficial in a minority of patients.</li> </ul>                                                 | 5%, with most a subset of fibrocystic sarcoidosis patients       |
| <i>Bronchiectasis, severe airway distortion</i>      | Fibrotic distortion of airways                                                                                                                                                                                                                                                                                                             | <ul style="list-style-type: none"> <li>• Enhance mucociliary clearance</li> <li>• Intermittent appropriate antibiotics</li> <li>• Possibly consider roflumilast</li> </ul>                                             | 5% - 10%, with most a subset of fibrocystic sarcoidosis patients |
| <i>Mycetoma</i>                                      | Colonization of fungus in devitalized, fibrotic sarcoidosis lung                                                                                                                                                                                                                                                                           | <ul style="list-style-type: none"> <li>• Surgical excision</li> <li>• Anti-fungal agents <ul style="list-style-type: none"> <li>– given systemically</li> <li>– Injected into mycetoma cavities</li> </ul> </li> </ul> | 1%, with most a subset of fibrocystic sarcoidosis patients.      |
